# Supplementary material
Source: MDPI journal article supplement (https://www.mdpi.com/2073-4441/13/21/2980)
Supplement: s1 [file s1]

## SUPPLEMENTARY MATERIALS

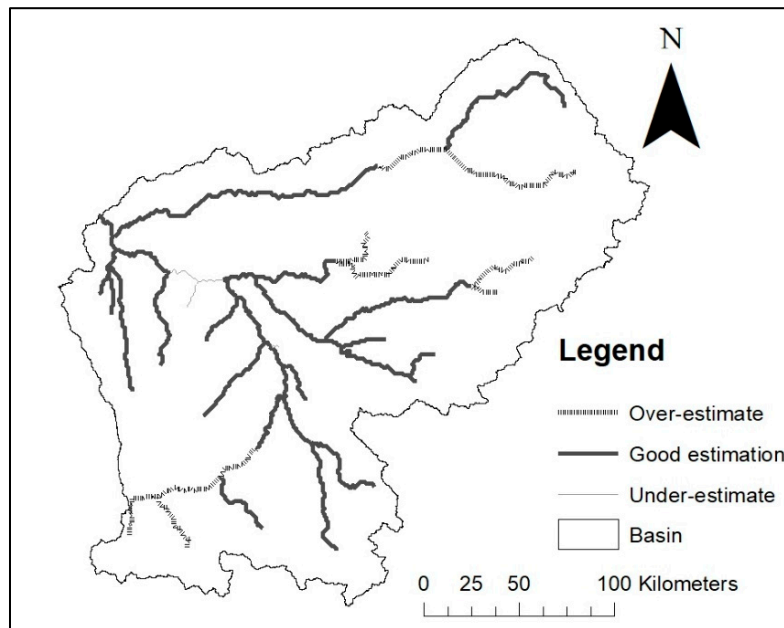

Figure S1: PBIAS performance of Nitrate Net Balance comparison between Water body and Subsystem models over Garonne watershed. The simulation has been performed from 2000 to 2010.

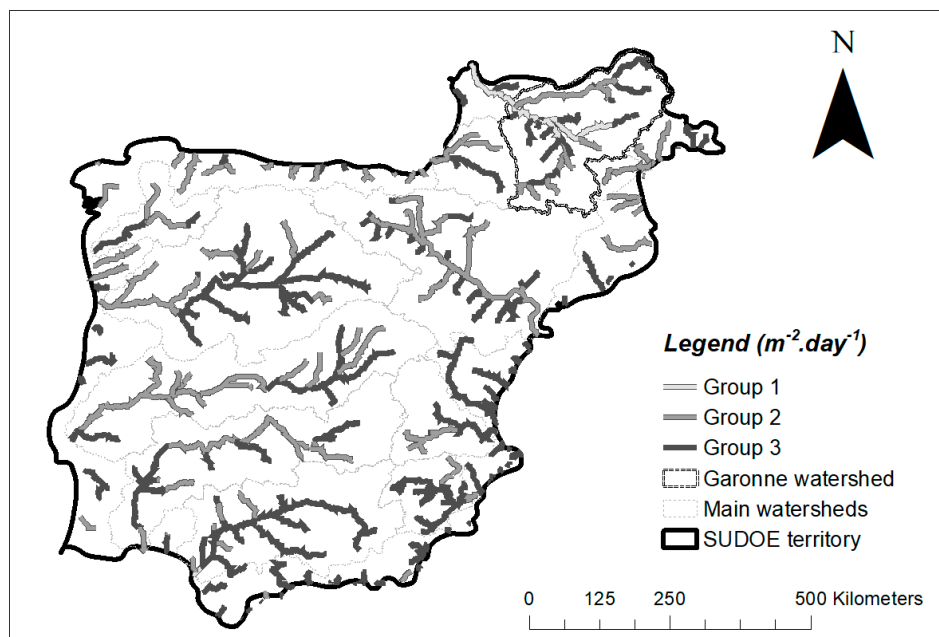

Figure S2: Spatial repartition of three groups defined by NNB value simulated by the Subsystem model over SUDOE territory between 2000 and 2010.
